# Supplementary material for: The Effects of Different Types of Steroids on Clinical Outcomes in Neonates with Meconium Aspiration Syndrome: A Systematic Review, Meta-Analysis and GRADE Assessment
Source: MDPI journal article supplement (doi:10.3390/medicina57111281), 2021-11-21

## **Supplementary Materials**

**Supplementary Table S1. Baseline maternal and neonatal characteristics of the included studies**

**Supplementary Table S2. Risk-of-bias summary of the included studies using Revised Cochrane risk-of-bias tool for randomized trials**

**Supplementary Table S3. GRADE evidence profile of the evidence outcomes**

**Supplementary Table S4. Summary results of the included studies categorized by outcomes**

**Supplementary Figure S1. Results of the outcomes in the systematic review and meta-analysis**

**Supplementary Table S1. Baseline characteristics of maternal and neonatal in the included studies**

| Study                                      | Steroids                             |                                       | Control                            |
|--------------------------------------------|--------------------------------------|---------------------------------------|------------------------------------|
| <b>Yeh et al., 1977 [28]</b>               | <b>IV hydrocortisone (n = 17)</b>    |                                       | <b>IV lactose hydrous (n = 18)</b> |
| Maternal age (years), mean±SD              | NR                                   |                                       | NR                                 |
| ANC, n (%)                                 | NR                                   |                                       | NR                                 |
| Non-NSVD, n (%)                            | NR                                   |                                       | NR                                 |
| Gestational age (weeks), mean±SD           | 40.7±0.4                             |                                       | 40.8±0.3                           |
| Birth weight (g), mean±SD                  | 3100±130                             |                                       | 3200±120                           |
| Apgar score at 1 min, mean±SD              | 5 ±0.6                               |                                       | 4.2±0.6                            |
| Apgar score at 5 min, mean±SD              | 5.7±0.8                              |                                       | 5.8±0.7                            |
| RDS at admission, mean±SD                  | 4.6±0.4                              |                                       | 4.3±0.4                            |
| FiO <sub>2</sub> on admission, mean±SD     | 0.61±0.06                            |                                       | 0.56±0.04                          |
| <b>Wu et al., 1999 [29]</b>                | <b>IV dexamethasone (n = 27)</b>     |                                       | <b>IV NSS (n = 23)</b>             |
| Maternal age (years), mean±SD              | NR                                   |                                       | NR                                 |
| ANC, n (%)                                 | NR                                   |                                       | NR                                 |
| Non-NSVD, n (%)                            | NR                                   |                                       | NR                                 |
| Gestational age (weeks), mean±SD           | NR                                   |                                       | NR                                 |
| Birth weight (g), mean±SD                  | NR                                   |                                       | NR                                 |
| Male, n (%)                                | NR                                   |                                       | NR                                 |
| FiO <sub>2</sub> on admission, mean±SD     | 0.52±0.24                            |                                       | 0.54±0.31                          |
| <b>Basu et al., 2007 [30]</b>              | <b>Nebulized budesonide (n = 32)</b> | <b>IV methylprednisolone (n = 34)</b> | <b>None (n = 33)</b>               |
| Maternal age (years), mean±SD              | 25.0±5.3                             | 25.7±4.8                              | 24.4±4.7                           |
| Gravida, mean±SD                           | 2.9±1.5                              | 2.9±1.5                               | 2.9±1.4                            |
| Non-NSVD (instrument and C-section), n (%) | 25 (78)                              | 25(74)                                | 27 (82)                            |
| Thick meconium, n (%)                      | 17 (53)                              | 19 (56)                               | 20 (61)                            |
| Gestational age (weeks), mean±SD           | 38.9±2.9                             | 39.0±2.8                              | 38.6±2.8                           |
| Birth weight (g), mean±SD                  | 2610±500                             | 2780±1680                             | 2580±490                           |
| Male, n (%)                                | 18 (56)                              | 21 (62)                               | 19 (58)                            |
| Apgar score at 1 min, mean±SD              | 4.2±1.6                              | 4.8±1.7                               | 5.0±2.2                            |
| Apgar score at 5 min, mean±SD              | 5.8±1.4                              | 5.7±1.4                               | 5.8±1.4                            |
| Apgar score at 10 min, mean±SD             | 6.9±1.2                              | 6.9±1.3                               | 7.0±1.3                            |
| Intratracheal suctioning, n (%)            | 32 (100)                             | 34 (100)                              | 33 (100)                           |
| RDS at admission, mean±SD                  | 3.1±1.9                              | 3.2±1.1                               | 3.4±1.3                            |
| <b>Tripathi et al., 2007 [31]</b>          | <b>Nebulized budesonide (n = 17)</b> | <b>IV methylprednisolone (n = 17)</b> | <b>Nebulized NSS and</b>           |

|                                                             |                                                  |          |                                  |
|-------------------------------------------------------------|--------------------------------------------------|----------|----------------------------------|
|                                                             |                                                  |          | <b>IV 5% dextrose (n = 17)</b>   |
| Maternal age (years), mean±SD                               | NR                                               | NR       | NR                               |
| ANC, n (%)                                                  | NR                                               | NR       | NR                               |
| Non-NSVD (instrument and C-section), n (%)                  | 10 (59)                                          | 9 (53)   | 11 (65)                          |
| Birth weight (g), mean±SD                                   | 2800±370                                         | 2630±450 | 2640±340                         |
| Apgar score at 1 min, mean±SD                               | 2.3±2.0                                          | 3.7±2.1  | 4.3±2.3                          |
| Apgar score at 5 min, mean±SD                               | 6.1±1.0                                          | 6.9±1.3  | 6.5±1.8                          |
| Apgar score at 10 min, mean±SD                              | 7.4±1.4                                          | 7.9±1.1  | 7.7±1.2                          |
| Infants with HIE, n (%)                                     | 3 (18)                                           | 3 (18)   | 4 (24)                           |
| <b>Suresh et al., 2015 [32]</b>                             | <b>Nebulized budesonide (n = 20)</b>             |          | <b>Nebulized NSS (n = 20)</b>    |
| Maternal age (years), mean±SD                               | NR                                               |          | NR                               |
| ANC, n (%)                                                  | NR                                               |          | NR                               |
| Non-NSVD (instrument and C-section), n (%)                  | 13 (65)                                          |          | 12 (60)                          |
| Birth weight (g), mean±SD                                   | 2820±167                                         |          | 2815±195                         |
| Male, n (%)                                                 | 15 (75)                                          |          | 13 (65)                          |
| Apgar score at 5 min, mean±SD                               | 6.0±0.8                                          |          | 6.2±0.9                          |
| RDS at initiation of treatment, mean±SD                     | 3.8±0.8                                          |          | 4.0±0.7                          |
| <b>Garg et al., 2016 [33]</b>                               | <b>Nebulized budesonide (n = 39)</b>             |          | <b>Nebulized NSS (n = 39)</b>    |
| Maternal age (years), mean±SD                               | NR                                               |          | NR                               |
| ANC, n (%)                                                  | NR                                               |          | NR                               |
| Non-NSVD (instrument and C-section), n (%)                  | NR                                               |          | NR                               |
| Male, n (%)                                                 | 22 (58)                                          |          | 22 (58)                          |
| <b>Tan et al., 2016 [34]</b>                                | <b>Intratracheal PS with budesonide (n = 35)</b> |          | <b>Intratracheal PS (n = 35)</b> |
| Maternal age (years), mean±SD                               | NR                                               |          | NR                               |
| ANC, n (%)                                                  | NR                                               |          | NR                               |
| Non-NSVD (instrument and C-section), n (%)                  | NR                                               |          | NR                               |
| Gestational age (weeks), mean±SD                            | 40±3                                             |          | 39±3                             |
| Birth weight (g), mean±SD                                   | 3437±594                                         |          | 3442±524                         |
| Male, n (%)                                                 | 21 (60)                                          |          | 20 (57)                          |
| Age at onset of respiratory distress, mean (hours), mean±SD | 8±4                                              |          | 8±3                              |
| <b>Sangeetha et al., 2017 [35]</b>                          | <b>IV dexamethasone (n = 30)</b>                 |          | <b>None (n = 30)</b>             |
| Maternal age (years), mean±SD                               | NR                                               |          | NR                               |
| ANC, n (%)                                                  | NR                                               |          | NR                               |
| Non-NSVD (instrument and C-section), n (%)                  | NR                                               |          | NR                               |

|                                            |                                                                  |                                                |
|--------------------------------------------|------------------------------------------------------------------|------------------------------------------------|
| Gestational age (weeks), mean±SD           | NR                                                               | NR                                             |
| Birth weight (g), mean±SD                  | NR                                                               | NR                                             |
| Male, n (%)                                | NR                                                               | NR                                             |
| <b>Patil et al., 2018 [36]</b>             | <b>IV dexamethasone (n = 34)</b>                                 | <b>None (n = 36)</b>                           |
| Maternal age (years), mean±SD              | 25.3±2.3                                                         | 24.9±2.0                                       |
| ANC, n (%)                                 | 26 (77)                                                          | 27 (75)                                        |
| Non-NSVD (instrument and C-section), n (%) | 8 (24)                                                           | 10 (28)                                        |
| Primigravida, n (%)                        | 22 (65)                                                          | 20 (56)                                        |
| Gestational age (weeks), mean±SD           | 38.90±1.2                                                        | 38.8±1.1                                       |
| Birth weight (g), mean±SD                  | 2700±300                                                         | 2700±400                                       |
| Male, n (%)                                | 20 (59)                                                          | 21 (58)                                        |
| Apgar score at 1 min, mean±SD              | 8.5±1.0                                                          | 8.3±1.3                                        |
| Apgar score at 5 min, mean±SD              | 8.5±0.5                                                          | 8.7±0.5                                        |
| Downes' score on admission, mean±SD        | 3.6±1.6                                                          | 3.5±1.5                                        |
| <b>Rana et al., 2018 [37]</b>              | <b>Nebulized budesonide with IV methylprednisolone (n = 137)</b> | <b>Nebulized 3% NaCl with IV NSS (n = 138)</b> |
| Maternal age (years), mean±SD              | NR                                                               | NR                                             |
| ANC, n (%)                                 | NR                                                               | NR                                             |
| Non-NSVD (instrument and C-section), n (%) | 66 (48)                                                          | 66 (48)                                        |
| Gestational age (weeks)                    |                                                                  |                                                |
| Term, n (%)                                | 98 (72)                                                          | 100 (73)                                       |
| Post-term, n (%)                           | 39 (29)                                                          | 38 (28)                                        |
| Birth weight > 2000 g, n (%)               | 137 (100)                                                        | 138 (100)                                      |
| Male, n (%)                                | 70 (51)                                                          | 71 (51)                                        |
| Downes' score on day 1, mean±SD            | 3.00±3.70*                                                       | 3.00±3.70*                                     |

**Abbreviations:** ANC = antenatal care; C-section = Cesarean section; HIE = hypoxic-ischemic encephalopathy; IV = intravenous; NaCl = sodium chloride; NSS = normal saline solution; NSVD = normal spontaneous vaginal delivery; NR = not reported; PS = porcine lung surfactant; RDS = respiratory distress score; SD = standard deviation

\*Converted data from median (interquartile range) to mean (SD)



|                      | Interventions                           | No. of participants<br>(studies) | Quality assessment |               |              |             |                  | Summary of findings |                                                                                 |                                             |                                                                                         |  |
|----------------------|-----------------------------------------|----------------------------------|--------------------|---------------|--------------|-------------|------------------|---------------------|---------------------------------------------------------------------------------|---------------------------------------------|-----------------------------------------------------------------------------------------|--|
|                      |                                         |                                  | Risk of bias       | Inconsistency | Indirectness | Imprecision | Publication Bias | Relative effects    | Estimation of absolute effects                                                  |                                             | Quality of evidence                                                                     |  |
|                      |                                         |                                  |                    |               |              |             |                  |                     | Control risk or control median duration <sup>1</sup>                            | Mean difference or risk difference (95% CI) |                                                                                         |  |
| Efficacy of steroids | Duration of respiratory distress (days) |                                  |                    |               |              |             |                  |                     |                                                                                 |                                             |                                                                                         |  |
|                      | Budesonide                              | 208<br>(4 studies)               | Serious            | Not serious   | Not serious  | Not serious | Undetected       | -                   | The median duration of respiratory distress in the control groups was 5.17 days | MD -2.46 days<br>(-3.09 to -1.83)           | Moderate ⊕⊕⊕⊖<br>(Serious risk of bias)                                                 |  |
|                      | Methylprednisolone                      | 96<br>(2 studies)                | Serious            | Not serious   | Not serious  | Not serious | Undetected       | -                   | The median duration of respiratory distress in the control groups was 5.17 days | MD -3.30 days<br>(-4.07 to -2.52)           | Moderate ⊕⊕⊕⊖<br>(Serious risk of bias)                                                 |  |
|                      | Duration of oxygen requirement (days)   |                                  |                    |               |              |             |                  |                     |                                                                                 |                                             |                                                                                         |  |
|                      | Budesonide                              | 208<br>(4 studies)               | Serious            | Serious       | Not serious  | Not serious | Undetected       | -                   | The median duration of oxygen requirement in the control groups was 4.94 days   | MD -2.40 days<br>(-3.40 to -1.40)           | Low ⊕⊕⊖⊖<br>(Serious risk of bias, serious inconsistency)                               |  |
|                      | Methylprednisolone                      | 96<br>(2 studies)                | Serious            | Not serious   | Not serious  | Not serious | Undetected       | -                   | The median duration of oxygen requirement in the control groups was 4.94 days   | MD -3.30 days<br>(-4.07 to -2.52)           | Moderate ⊕⊕⊕⊖<br>(Serious risk of bias)                                                 |  |
|                      | Need for mechanical ventilation         |                                  |                    |               |              |             |                  |                     |                                                                                 |                                             |                                                                                         |  |
|                      | Dexamethasone                           | 130<br>(2 studies)               | Serious            | Serious       | Not serious  | Serious     | Undetected       | 1.23 (0.17-8.87)    | 25.00%                                                                          | 5.75 (-20.75 to 196.75)                     | Very low ⊕⊖⊖⊖<br>(Serious risk of bias, serious inconsistency, and serious imprecision) |  |
|                      | Duration of X-ray clearance (days)      |                                  |                    |               |              |             |                  |                     |                                                                                 |                                             |                                                                                         |  |

|                             |                                                                     |                    |         |             |             |             |            |                  |                                                                                            |                                    |                                                                                          |
|-----------------------------|---------------------------------------------------------------------|--------------------|---------|-------------|-------------|-------------|------------|------------------|--------------------------------------------------------------------------------------------|------------------------------------|------------------------------------------------------------------------------------------|
|                             | Budesonide                                                          | 94<br>(2 studies)  | Serious | Serious     | Not serious | Serious     | Undetected | -                | The median duration of X-ray clearance in the control groups was 7.76 days                 | MD −5.99 days<br>(−12.53 to 0.56)  | Very low ⊕⊕⊕⊕<br>(Serious risk of bias, serious inconsistency, and serious imprecision)  |
|                             | Methylprednisolone                                                  | 96 (2 studies)     | Serious | Serious     | Not serious | Serious     | Undetected | -                | The median duration of X-ray clearance in the control groups was 7.76 days                 | MD −5.83 days<br>(−12.51 to 0.85 ) | Very low ⊕⊕⊕⊕<br>(Serious risk of bias, serious inconsistency, and serious imprecision)  |
|                             | <i>Duration of hospitalization, NICU stay, and PICU stay (days)</i> |                    |         |             |             |             |            |                  |                                                                                            |                                    |                                                                                          |
|                             | Budesonide                                                          | 208<br>(4 studies) | Serious | Serious     | Not serious | Not serious | Undetected | -                | The median duration of hospitalization/NICU stay in the control groups was 14.00 days      | MD −4.47 days<br>(−8.64 to −0.30)  | Low ⊕⊕⊕⊕<br>(Serious risk of bias, serious inconsistency)                                |
|                             | Methylprednisolone                                                  | 96<br>(2 studies)  | Serious | Not serious | Not serious | Not serious | Undetected | -                | The median duration of hospitalization/NICU stay in the control groups was 14.00 days      | MD −7.23 days<br>(−8.19 to −6.27)  | Moderate ⊕⊕⊕⊕<br>(Serious risk of bias)                                                  |
|                             | <i>Time until achievement of full feeding (days)</i>                |                    |         |             |             |             |            |                  |                                                                                            |                                    |                                                                                          |
|                             | Budesonide                                                          | 101<br>(2 studies) | Serious | Serious     | Serious     | Not serious | Undetected | -                | The median duration until achievement of full feeding in the control groups was 11.34 days | MD −6.54 days<br>(−8.94 to −4.13)  | Very low ⊕⊕⊕⊕<br>(Serious risk of bias, serious indirectness, and serious inconsistency) |
| Infection and complications | <i>Infections</i>                                                   |                    |         |             |             |             |            |                  |                                                                                            |                                    |                                                                                          |
|                             | <b>Meningitis</b>                                                   |                    |         |             |             |             |            |                  |                                                                                            |                                    |                                                                                          |
|                             | Budesonide                                                          | 139<br>(3 studies) | Serious | Not serious | Not serious | Serious     | Undetected | 0.76 (0.28–2.08) | 10.00%                                                                                     | −2.40 (−7.20 to 10.80)             | Low ⊕⊕⊕⊕<br>(Serious risk of bias, serious imprecision)                                  |
|                             | Methylprednisolone                                                  | 101<br>(2 studies) | Serious | Not serious | Not serious | Serious     | Undetected | 0.84 (0.31–2.29) | 10.00%                                                                                     | −1.60 (−6.90 to 12.90)             | Low ⊕⊕⊕⊕<br>(Serious risk of bias, serious imprecision)                                  |
|                             | <b>Sepsis without meningitis</b>                                    |                    |         |             |             |             |            |                  |                                                                                            |                                    |                                                                                          |
|                             | Budesonide                                                          | 217<br>(4 studies) | Serious | Not serious | Not serious | Serious     | Undetected | 0.53 (0.26–1.07) | 15.42%                                                                                     | −7.25 (−11.41 to 1.08)             | Low ⊕⊕⊕⊕<br>(Serious risk of bias, serious imprecision)                                  |
|                             | Methylprednisolone                                                  | 101                | Serious | Not serious | Not serious | Serious     | Undetected | 0.55 (0.24–1.23) | 15.42%                                                                                     | −6.94 (−11.72 to 3.55)             | Low ⊕⊕⊕⊕                                                                                 |

|                            |                    |         |             |             |         |            |                  |        |                          |                                                                                        |
|----------------------------|--------------------|---------|-------------|-------------|---------|------------|------------------|--------|--------------------------|----------------------------------------------------------------------------------------|
|                            | (2 studies)        |         |             |             |         |            |                  |        |                          | (Serious risk of bias, serious imprecision)                                            |
| <b>Fungal infection</b>    |                    |         |             |             |         |            |                  |        |                          |                                                                                        |
| Budesonide                 | 99<br>(2 studies)  | Serious | Not serious | Not serious | Serious | Undetected | 0.50 (0.11–2.23) | 11.67% | –5.84 (–10.39 to 14.35)  | Low ⊕⊕⊕⊖<br>(Serious risk of bias, serious imprecision)                                |
| Methylprednisolone         | 101<br>(2 studies) | Serious | Not serious | Not serious | Serious | Undetected | 0.27 (0.05–1.60) | 11.67% | –8.52 (–11.09 to 7.00)   | Low ⊕⊕⊕⊖<br>(Serious risk of bias, serious imprecision)                                |
| <b>Oral thrush</b>         |                    |         |             |             |         |            |                  |        |                          |                                                                                        |
| Budesonide                 | 99<br>(2 studies)  | Serious | Not serious | Not serious | Serious | Undetected | 0.68 (0.30–1.57) | 36.20% | –11.58 (–25.34 to 20.63) | Low ⊕⊕⊕⊖<br>(Serious risk of bias, serious imprecision)                                |
| Methylprednisolone         | 101<br>(2 studies) | Serious | Not serious | Not serious | Serious | Undetected | 0.54 (0.22–1.32) | 36.20% | –16.65 (–28.24 to 11.58) | Low ⊕⊕⊕⊖<br>(Serious risk of bias, serious imprecision)                                |
| <b>Other complications</b> |                    |         |             |             |         |            |                  |        |                          |                                                                                        |
| <b>Pneumothorax</b>        |                    |         |             |             |         |            |                  |        |                          |                                                                                        |
| Budesonide                 | 118<br>(2 studies) | Serious | Not serious | Not serious | Serious | Undetected | 0.28 (0.05–1.64) | 9.72%  | –7.00 (–9.23 to 6.22)    | Low ⊕⊕⊕⊖<br>(Serious risk of bias, serious imprecision)                                |
| <b>Hypotension</b>         |                    |         |             |             |         |            |                  |        |                          |                                                                                        |
| Budesonide                 | 105<br>(2 studies) | Serious | Not serious | Not serious | Serious | Undetected | 0.85 (0.27–2.62) | 13.82% | –2.07 (–10.09 to 22.39)  | Low ⊕⊕⊕⊖<br>(Serious risk of bias, serious imprecision)                                |
| <b>Hypoglycemia</b>        |                    |         |             |             |         |            |                  |        |                          |                                                                                        |
| Budesonide                 | 105<br>(2 studies) | Serious | Not serious | Serious     | Serious | Undetected | 0.92 (0.41–2.07) | 22.29% | –1.78 (–13.15 to 23.85)  | Very low ⊕⊕⊕⊖<br>(Serious risk of bias, serious indirectness, and serious imprecision) |
| <b>Hyperbilirubinemia</b>  |                    |         |             |             |         |            |                  |        |                          |                                                                                        |
| Budesonide                 | 105<br>(2 studies) | Serious | Not serious | Serious     | Serious | Undetected | 1.02 (0.39–2.70) | 17.86% | 0.36 (–10.89 to 30.36)   | Very low ⊕⊕⊕⊖<br>(Serious risk of bias, serious indirectness, and serious imprecision) |



|                    |                    |         |             |             |         |            |                  |        |                         |                                                                                        |  |
|--------------------|--------------------|---------|-------------|-------------|---------|------------|------------------|--------|-------------------------|----------------------------------------------------------------------------------------|--|
| <b>Seizure</b>     |                    |         |             |             |         |            |                  |        |                         |                                                                                        |  |
| Budesonide         | 105<br>(2 studies) | Serious | Not serious | Serious     | Serious | Undetected | 0.31 (0.05–1.92) | 10.56% | –7.29 (–10.03 to 9.72)  | Very low ⊕⊖⊖⊖<br>(Serious risk of bias, serious indirectness, and serious imprecision) |  |
| <b>Death</b>       |                    |         |             |             |         |            |                  |        |                         |                                                                                        |  |
| Budesonide         | 217<br>(4 studies) | Serious | Not serious | Not serious | Serious | Undetected | 0.55 (0.22–1.39) | 11.43% | –5.14 (–8.92 to 4.46)   | Low ⊕⊕⊖⊖<br>(Serious risk of bias, serious imprecision)                                |  |
| Dexamethasone      | 120<br>(2 studies) | Serious | Not serious | Not serious | Serious | Undetected | 0.98 (0.15–6.41) | 11.43% | –0.23 (–9.72 to 61.84)  | Low ⊕⊕⊖⊖<br>(Serious risk of bias, serious imprecision)                                |  |
| Methylprednisolone | 101<br>(2 studies) | Serious | Not serious | Not serious | Serious | Undetected | 0.50 (0.12–2.13) | 11.43% | –5.72 (–10.06 to 12.92) | Low ⊕⊕⊖⊖<br>(Serious risk of bias, serious imprecision)                                |  |

**Abbreviations:** CI = confidence interval; MD = mean difference; NICU = neonatal intensive care unit; PICU = pediatric intensive care unit

**Footnote:**  
1 Median baseline risk was used for the control group in the eligible randomized controlled trials.

**Supplementary Table S4. Summary results of the included studies categorized by outcomes**

|          | Authors (year)                                            | Intervention                                   | Steroids   | Control   | Mean difference<br>(95% CI) |
|----------|-----------------------------------------------------------|------------------------------------------------|------------|-----------|-----------------------------|
|          |                                                           |                                                | Mean±SD    | Mean±SD   |                             |
| Outcomes | Duration of respiratory distress (day)                    |                                                |            |           |                             |
|          | Yeh et al., 1977                                          | IV hydrocortisone                              | 3.32±0.48  | 1.9±0.37  | 1.42 (1.1, 1.71)            |
|          | Overall ( <i>I</i> <sup>2</sup> = %, <i>P</i> =)          |                                                |            |           | 1.42 (1.13, 1.71)           |
|          | Basu et al., 2007                                         | Nebulized budesonide                           | 4.59±2.26  | 7.70±1.6  | -3.11 (-4.07, -2.15)        |
|          | Tripathi et al., 2007                                     | Nebulized budesonide                           | 4.06±1.52  | 7.00±4.81 | -2.94 (-5.57, -0.31)        |
|          | Suresh et al., 2015                                       | Nebulized budesonide                           | 2.63±0.96  | 5.24±5.48 | -2.61 (-5.25, 0.03)         |
|          | Garg et al., 2016                                         | Nebulized budesonide                           | 3.06±1.43  | 5.09±1.46 | -2.03 (-2.67, -1.39)        |
|          | Overall ( <i>I</i> <sup>2</sup> = 15.8%, <i>P</i> =0.313) |                                                |            |           | -2.46 (-3.09, -1.83)        |
|          | Basu et al., 2007                                         | IV methylprednisolone                          | 4.41±1.76  | 7.70±1.63 | -3.29 (-4.10, -2.48)        |
|          | Tripathi et al., 2007                                     | IV methylprednisolone                          | 3.65±1.18  | 7.00±4.81 | -3.35 (-5.94, -0.76)        |
|          | Overall ( <i>I</i> <sup>2</sup> = 0.0%, <i>P</i> = 0.965) |                                                |            |           | -3.30 (-4.07, -2.52)        |
|          | Rana et al., 2018                                         | Nebulized budesonide and IV methylprednisolone | 3.00±1.48* | 3.50±7.4* | -0.50 (-1.76, 0.76)         |
|          | Overall ( <i>I</i> <sup>2</sup> = %, <i>P</i> =)          |                                                |            |           | -0.50 (-1.76, 0.76)         |
|          | Duration of oxygen requirement (days)                     |                                                |            |           |                             |
|          | Yeh et al., 1977                                          | IV hydrocortisone                              | 2.87±0.4   | 1.53±0.29 | 1.34 (1.11, 1.57)           |
|          | Overall ( <i>I</i> <sup>2</sup> = %, <i>P</i> =)          |                                                |            |           | 1.34 (1.11, 1.57)           |
|          | Wu et al., 1999                                           | IV dexamethasone                               | 7.00± 4.10 | 6.60±5.80 | 0.40 (-2.43, 3.23)          |
|          | Overall ( <i>I</i> <sup>2</sup> = %, <i>P</i> =)          |                                                |            |           | 0.40 (-2.43, 3.23)          |
|          | Basu et al., 2007                                         | Nebulized budesonide                           | 4.59±2.26  | 7.70±1.63 | -3.11 (-4.07, -2.15)        |
|          | Tripathi et al., 2007                                     | Nebulized budesonide                           | 4.06±1.52  | 7.00±4.81 | -2.94 (-5.57, -0.31)        |
|          | Suresh et al., 2015                                       | Nebulized budesonide                           | 2.37±0.60  | 4.94±5.24 | -2.57 (-5.08, -0.06)        |
|          | Garg et al., 2016                                         | Nebulized budesonide                           | 1.79±0.95  | 3.46±1.15 | -1.67 (-2.14, -1.20)        |
|          | Overall ( <i>I</i> <sup>2</sup> = 61.2%, <i>P</i> =0.052) |                                                |            |           | -2.40 (-3.40, -1.40)        |
|          | Basu et al., 2007                                         | IV methylprednisolone                          | 4.41±1.76  | 7.70±1.63 | -3.29 (-4.10, -2.48)        |

|  |                                                                     |                                                |            |            |                      |
|--|---------------------------------------------------------------------|------------------------------------------------|------------|------------|----------------------|
|  | Tripathi et al., 2007                                               | IV methylprednisolone                          | 3.65±1.18  | 7.00±4.81  | -3.35 (-5.94, -0.76) |
|  | Overall ( $I^2 = 0.0\%$ , $P = 0.965$ )                             |                                                |            |            | -3.30 (-4.07, -2.52) |
|  | Rana et al., 2018                                                   | Nebulized budesonide and IV methylprednisolone | 3.00±1.85* | 4.00±9.63* | -1.00 (-2.64, 0.64)  |
|  | Overall ( $I^2 = \%$ , $P =$ )                                      |                                                |            |            | -1.00 (-2.64, 0.64)  |
|  | <b>Duration of mechanical ventilation (days)</b>                    |                                                |            |            |                      |
|  | Wu et al., 1999                                                     | IV dexamethasone                               | 3.50±3.10  | 4.60±3.00  | -1.10 (-2.79, 0.59)  |
|  | Suresh et al., 2015                                                 | Nebulized budesonide                           | 0±0        | 0.2±0.41   | NA                   |
|  | Rana et al., 2018                                                   | Nebulized budesonide and IV methylprednisolone | 2.00±1.48* | 4.00±1.85* | -2.00 (-2.40, -1.60) |
|  | <b>Downes' score day 3</b>                                          |                                                |            |            |                      |
|  | Garg et al., 2016                                                   | Nebulized budesonide                           | 1.00±1.41  | 2.61±1.27  | -1.61 (-2.21, -1.01) |
|  | Rana et al., 2018                                                   | Nebulized budesonide and IV methylprednisolone | 1.00±2.22* | 2.00±3.33* | -1.00 (-1.67, -0.33) |
|  | <b>Downes' score day 5</b>                                          |                                                |            |            |                      |
|  | Garg et al., 2016                                                   | Nebulized budesonide                           | 0.36±0.58  | 0.81±0.92) | -0.45 (-0.79, -0.11) |
|  | Rana et al., 2018                                                   | Nebulized budesonide and IV methylprednisolone | 0±1.48*    | 2.00±1.48* | -2.00 (-2.35, -1.65) |
|  | <b>Duration of X-ray clearance (days)</b>                           |                                                |            |            |                      |
|  | Yeh et al., 1977                                                    | IV hydrocortisone                              | 4.50±0.6   | 4.20±0.5   | 0.30 (-0.07, 0.67)   |
|  | Overall ( $I^2 = \%$ , $P =$ )                                      |                                                |            |            | 0.30 (-0.07, 0.67)   |
|  | Basu et al., 2007                                                   | Nebulized budesonide                           | 6.56±1.22  | 15.82±1.26 | -9.26 (-9.86, -8.66) |
|  | Tripathi et al., 2007                                               | Nebulized budesonide                           | 5.18±1.80  | 7.76±3.31  | -2.58 (-4.54, -0.62) |
|  | Overall ( $I^2 = 97.6\%$ , $P = 0.00$ )                             |                                                |            |            | -5.99 (-12.53, 0.56) |
|  | Basu et al., 2007                                                   | IV methylprednisolone                          | 6.65±1.07  | 15.82±1.26 | -9.17 (-9.73, -8.61) |
|  | Tripathi et al., 2007                                               | IV methylprednisolone                          | 5.41±1.90  | 7.76±3.31  | -2.35 (-4.33, -0.37) |
|  | Overall ( $I^2 = 97.6\%$ , $P = 0.00$ )                             |                                                |            |            | -5.83 (-12.51, 0.85) |
|  | <b>Duration of hospitalization, NICU stay, and PICU stay (days)</b> |                                                |            |            |                      |
|  | Wu et al., 1999                                                     | IV dexamethasone                               | 14.00±5.00 | 14.00±6.00 | 0.00 (-3.09, 3.09)   |

|                        |                                               |                                                |             |             |                           |
|------------------------|-----------------------------------------------|------------------------------------------------|-------------|-------------|---------------------------|
| Adverse drug reactions | Overall ( $I^2 = \%$ , $P =$ )                |                                                |             |             | 0.00 (−3.09 to 3.09)      |
|                        | Basu et al., 2007                             | Nebulized budesonide                           | 10.63±1.56  | 18.06±2.33  | −7.43 (−8.39, −6.47)      |
|                        | Tripathi et al., 2007                         | Nebulized budesonide                           | 12.18±6.22  | 19.59±12.77 | −7.41 (−14.80, −0.02)     |
|                        | Suresh et al., 2015                           | Nebulized budesonide                           | 7.58±2.81   | 10.47±5.21  | −2.89 (−5.67, −0.11)      |
|                        | Garg et al., 2016                             | Nebulized budesonide                           | 4.41±1.68   | 5.79±2.21   | −1.38 (−2.25, −0.51)      |
|                        | Overall ( $I^2 = 96.5\%$ , $P = 0.00$ )       |                                                |             |             | −4.47 (−8.64, −0.30)      |
|                        | Basu et al., 2007                             | IV methylprednisolone                          | 10.82±1.64  | 18.06±2.33  | −7.24 (−8.21, −6.27)      |
|                        | Tripathi et al., 2007                         | IV methylprednisolone                          | 13.29±7.48  | 19.59±12.77 | −6.30 (−13.99, 1.39)      |
|                        | Overall ( $I^2 = 0.0\%$ , $P = 0.812$ )       |                                                |             |             | −7.23 (−8.19, −6.27)      |
|                        | Rana et al., 2018                             | Nebulized budesonide and IV methylprednisolone | 8.00±1.48*  | 9.00±12.59* | −1.00 (−3.12, 1.12)       |
|                        | Overall ( $I^2 = \%$ , $P =$ )                |                                                |             |             | −1.00 (−3.12, 1.12)       |
|                        | Tan et al., 2016                              | Intratracheal PS with budesonide               | 16.00±3.00  | 24.00±5.00  | −8.00 (−9.93, −6.07)      |
|                        | Overall ( $I^2 = \%$ , $P =$ )                |                                                |             |             | −8.00 (−9.93, −6.07)      |
|                        | Time until achievement of full feeding (days) |                                                |             |             |                           |
|                        | Basu et al., 2007                             | Nebulized budesonide                           | 6.41±0.87   | 13.91±1.23  | −7.50 (−8.02, −6.98)      |
|                        | Suresh et al., 2015                           | Nebulized budesonide                           | 3.79±1.62   | 8.76±4.97   | −4.97 (−7.44, −2.50)      |
|                        | Overall ( $I^2 = 74.1\%$ , $P = 0.050$ )      |                                                |             |             | −6.54 (−8.94, −4.13)      |
|                        | Basu et al., 2007                             | IV methylprednisolone                          | 6.56±1.40   | 13.91±1.23  | −7.35 (−7.98, −6.72)      |
|                        | Overall ( $I^2 = \%$ , $P =$ )                |                                                |             |             | −7.35 (−7.98, −6.72)      |
|                        | Duration of IV fluid requirement (days)       |                                                |             |             |                           |
|                        | Basu et al., 2007                             | Nebulized budesonide                           | 5.96±1.03   | 12.91±1.23  | −6.95 (−7.50, −6.40)      |
|                        | Tripathi et al., 2007                         | Nebulized budesonide                           | NR          | NR          |                           |
|                        | Basu et al., 2007                             | IV methylprednisolone                          | 5.85±1.26   | 12.91±1.23  | −7.06 (−7.66, −6.46)      |
|                        | Tripathi et al., 2007                         | IV methylprednisolone                          | NR          | NR          |                           |
|                        | Author                                        | Intervention                                   | Steroids    | Control     | Relative risk<br>(95% CI) |
|                        |                                               |                                                | Event/Total | Event/Total |                           |
|                        | Need for mechanical ventilation               |                                                |             |             |                           |
|                        | Yeh et al., 1977                              | IV hydrocortisone                              | 4/17        | 3/18        | 1.41 (0.37,5.40)          |
|                        | Overall ( $I^2 = \%$ , $P =$ )                |                                                |             |             | 1.41 (0.37, 5.40)         |

|  |                                          |                                  |       |       |                    |
|--|------------------------------------------|----------------------------------|-------|-------|--------------------|
|  | Sangeetha et al., 2017                   | IV dexamethasone                 | 5/30  | 9/30  | 0.56 (0.21, 1.46)  |
|  | Patil et al., 2018                       | IV dexamethasone                 | 4/34  | 1/36  | 4.24 (0.5, 36.02)  |
|  | Overall ( $I^2 = 66.5\%$ , $P = 0.084$ ) |                                  |       |       | 1.23 (0.17, 8.87)  |
|  | Basu et al., 2007                        | Nebulized budesonide             | 0/32  | NR    | NA                 |
|  | Garg et al., 2016                        | Nebulized budesonide             | 12/39 | 10/39 | 1.20 (0.59, 2.45)  |
|  | Basu et al., 2007                        | IV methylprednisolone            | 0/34  | NR    | NA                 |
|  | Tan et al., 2016                         | Intratracheal PS with budesonide | 3/35  | 7/35  | 0.43 (0.12, 1.52)  |
|  | <b>Meningitis</b>                        |                                  |       |       |                    |
|  | Basu et al., 2007                        | Nebulized budesonide             | 3/32  | 3/33  | 1.03 (0.22, 4.74)  |
|  | Tripathi et al., 2007                    | Nebulized budesonide             | 2/17  | 4/17  | 0.50 (0.11, 2.38)  |
|  | Suresh et al., 2015                      | Nebulized budesonide             | 1/20  | 1/20  | 1.00 (0.07, 14.90) |
|  | Overall ( $I^2 = 0.0\%$ , $P = 0.790$ )  |                                  |       |       | 0.76 (0.28, 2.08)  |
|  | Basu et al., 2007                        | IV methylprednisolone            | 3/34  | 3/33  | 0.97 (0.21, 4.47)  |
|  | Tripathi et al., 2007                    | IV methylprednisolone            | 3/17  | 4/17  | 0.75 (0.20, 2.86)  |
|  | Overall ( $I^2 = 0.0\%$ , $P = 0.803$ )  |                                  |       |       | 0.84 (0.31, 2.29)  |
|  | <b>Sepsis without meningitis</b>         |                                  |       |       |                    |
|  | Patil et al., 2018                       | IV dexamethasone                 | 3/34  | 5/36  | 0.64 (0.16, 2.46)  |
|  | Overall ( $I^2 = \%$ , $P =$ )           |                                  |       |       | 0.64 (0.16, 2.46)  |
|  | Basu et al., 2007                        | Nebulized budesonide             | 1/32  | 2/33  | 0.52 (0.05, 5.41)  |
|  | Tripathi et al., 2007                    | Nebulized budesonide             | 3/17  | 9/17  | 0.33 (0.11, 1.02)  |
|  | Suresh et al., 2015                      | Nebulized budesonide             | 3/20  | 3/20  | 1.00 (0.23, 4.37)  |
|  | Garg et al., 2016                        | Nebulized budesonide             | 3/39  | 5/39  | 0.60 (0.15, 2.34)  |
|  | Overall ( $I^2 = 0.0\%$ , $P = 0.705$ )  |                                  |       |       | 0.53 (0.26, 1.07)  |
|  | Basu et al., 2007                        | IV methylprednisolone            | 1/34  | 2/33  | 0.49 (0.05, 5.10)  |
|  | Tripathi et al., 2007                    | IV methylprednisolone            | 5/17  | 9/17  | 0.56 (0.23, 1.32)  |
|  | Overall ( $I^2 = 0.0\%$ , $P = 0.915$ )  |                                  |       |       | 0.55 (0.24, 1.23)  |
|  | Tan et al., 2016                         | Intratracheal PS with budesonide | 0/35  | 2/35  | 0.20 (0.01, 4.02)  |
|  | Overall ( $I^2 = \%$ , $P =$ )           |                                  |       |       | 0.20 (0.01, 4.02)  |

|                                                         |                                  |      |      |                   |
|---------------------------------------------------------|----------------------------------|------|------|-------------------|
| <b>Fungal infection</b>                                 |                                  |      |      |                   |
| Basu et al., 2007                                       | Nebulized budesonide             | 2/32 | 3/33 | 0.69 (0.12, 3.85) |
| Tripathi et al., 2007                                   | Nebulized budesonide             | 0/7  | 2/17 | 0.20 (0.01, 3.88) |
| Overall ( $I^2 = 0.0\%$ , $P = 0.475$ )                 |                                  |      |      | 0.50 (0.11, 2.23) |
| Basu et al., 2007                                       | IV methylprednisolone            | 1/34 | 3/33 | 0.32 (0.04, 2.95) |
| Tripathi et al., 2007                                   | IV methylprednisolone            | 0/17 | 2/17 | 0.20 (0.01, 3.88) |
| Overall ( $I^2 = 0.0\%$ , $P = 0.798$ )                 |                                  |      |      | 0.27 (0.05, 1.60) |
| <b>Oral thrush</b>                                      |                                  |      |      |                   |
| Basu et al., 2007                                       | Nebulized budesonide             | 2/32 | 5/33 | 0.41 (0.09, 1.97) |
| Tripathi et al., 2007                                   | Nebulized budesonide             | 5/17 | 6/17 | 0.83 (0.31, 2.22) |
| Overall ( $I^2 = 0.0\%$ , $P = 0.447$ )                 |                                  |      |      | 0.68 (0.30, 1.57) |
| Basu et al., 2007                                       | IV methylprednisolone            | 3/34 | 5/33 | 0.58 (0.15, 2.24) |
| Tripathi et al., 2007                                   | IV methylprednisolone            | 3/17 | 6/17 | 0.50 (0.15, 1.68) |
| Overall ( $I^2 = 0.0\%$ , $P = 0.869$ )                 |                                  |      |      | 0.54 (0.22, 1.32) |
| <b>Pneumothorax</b>                                     |                                  |      |      |                   |
| Suresh et al., 2015                                     | Nebulized budesonide             | 0/20 | 2/20 | 0.20 (0.01, 3.92) |
| Garg et al, 201                                         | Nebulized budesonide             | 1/39 | 3/39 | 0.33 (0.04, 3.07) |
| Overall ( $I^2 = 0.0\%$ , $P = 0.787$ )                 |                                  |      |      | 0.28 (0.05, 1.64) |
| Yeh et al., 1977                                        | IV hydrocortisone                | 3/17 | 5/18 | 0.64 (0.18, 2.26) |
| Overall ( $I^2 = \%$ , $P =$ )                          |                                  |      |      | 0.64 (0.18, 2.26) |
| Sangeetha et al., 2017                                  | IV dexamethasone                 | 1/30 | 2/30 | 0.50 (0.05, 5.22) |
| Patil et al., 2018                                      | IV dexamethasone                 | 0/34 | 0/36 | NA                |
| Overall ( $I^2 = \%$ , $P =$ )                          |                                  |      |      | 0.50 (0.05, 5.22) |
| <b>Persistent pulmonary hypertension of the newborn</b> |                                  |      |      |                   |
| Basu et al., 2007                                       | Nebulized budesonide             | 0/32 | 0/33 | NA                |
| Garg et al., 2016                                       | Nebulized budesonide             | 1/39 | 3/39 | 0.33 (0.0, 3.07)  |
| Basu et al., 2007                                       | IV methylprednisolone            | 0/34 | 0/33 | NA                |
| Tan et al., 2016                                        | Intratracheal PS with budesonide | 2/35 | 5/35 | 0.40 (0.08, 1.93) |

|  |                                         |                       |      |      |                   |
|--|-----------------------------------------|-----------------------|------|------|-------------------|
|  | <b>Pulmonary vasodilator needed</b>     |                       |      |      |                   |
|  | Patil et al., 2018                      | IV dexamethasone      | 3/34 | 4/36 | 0.79 (0.19, 3.29) |
|  | <b>Respiratory arrest</b>               |                       |      |      |                   |
|  | Basu et al., 2007                       | Nebulized budesonide  | 4/32 | 3/33 | 1.38 (0.33, 5.66) |
|  | Basu et al., 2007                       | IV methylprednisolone | 3/34 | 3/33 | 0.97 (0.21, 4.47) |
|  | <b>Hypotension</b>                      |                       |      |      |                   |
|  | Basu et al., 2007                       | Nebulized budesonide  | 3/32 | 3/33 | 1.03 (0.22, 4.74) |
|  | Suresh et al., 2015                     | Nebulized budesonide  | 2/20 | 3/20 | 0.67 (0.12, 3.57) |
|  | Overall ( $I^2 = 0.0\%$ , $P = 0.706$ ) |                       |      |      | 0.85 (0.27, 2.62) |
|  | Basu et al., 2007                       | IV methylprednisolone | 4/34 | 3/33 | 1.29 (0.31, 5.34) |
|  | Overall ( $I^2 = \%$ , $P =$ )          |                       |      |      | 1.29 (0.31, 5.34) |
|  | <b>Hypoglycemia</b>                     |                       |      |      |                   |
|  | Basu et al., 2007                       | Nebulized budesonide  | 6/32 | 7/33 | 0.88 (0.33, 2.35) |
|  | Suresh et al., 2015                     | Nebulized budesonide  | 3/20 | 3/20 | 1.00 (0.23, 4.37) |
|  | Overall ( $I^2 = 0.0\%$ , $P = 0.891$ ) |                       |      |      | 0.92 (0.41, 2.07) |
|  | Basu et al., 2007)                      | IV methylprednisolone | 8/34 | 7/33 | 1.11 (0.45, 2.71) |
|  | Overall ( $I^2 = \%$ , $P =$ )          |                       |      |      | 1.11 (0.45, 2.71) |
|  | <b>Hypocalcemia</b>                     |                       |      |      |                   |
|  | Basu et al., 2007                       | Nebulized budesonide  | 2/32 | 4/33 | 0.52 (0.10, 2.62) |
|  | Suresh et al., 2015                     | Nebulized budesonide  | 0/20 | 0/20 | NA                |
|  | Overall ( $I^2 = \%$ , $P =$ )          |                       |      |      | 0.52 (0.10, 2.62) |
|  | Basu et al., 2007                       | IV methylprednisolone | 4/34 | 4/33 | 0.97 (0.26, 3.56) |
|  | Overall ( $I^2 = \%$ , $P =$ )          |                       |      |      | 0.97 (0.26, 3.56) |
|  | <b>Seizure</b>                          |                       |      |      |                   |
|  | Basu et al., 2007                       | Nebulized budesonide  | 0/32 | 3/33 | 0.15 (0.01, 2.74) |
|  | Suresh et al., 2015                     | Nebulized budesonide  | 1/20 | 2/20 | 0.50 (0.05, 5.08) |
|  | Overall ( $I^2 = 0.0\%$ , $P = 0.512$ ) |                       |      |      | 0.31 (0.05, 1.92) |
|  | Basu et al., 2007                       | IV methylprednisolone | 1/34 | 3/33 | 0.32 (0.04, 2.95) |

|                                         |                       |      |      |                    |
|-----------------------------------------|-----------------------|------|------|--------------------|
| Overall ( $I^2 = \%$ , $P =$ )          |                       |      |      | 0.32 (0.04, 2.95)  |
| <b>Hyperbilirubinemia</b>               |                       |      |      |                    |
| Basu et al., 2007                       | Nebulized budesonide  | 5/32 | 5/33 | 1.03 (0.33, 3.23)  |
| Suresh et al., 2015                     | Nebulized budesonide  | 2/20 | 2/20 | 1.00 (0.16, 6.42)  |
| Overall ( $I^2 = 0.0\%$ , $P = 0.978$ ) |                       |      |      | 1.02 (0.39, 2.70)  |
| Basu et al., 2007                       | IV methylprednisolone | 6/34 | 5/33 | 1.16 (0.39, 3.45)  |
| Overall ( $I^2 = \%$ , $P =$ )          |                       |      |      | 1.16 (0.39, 3.45)  |
| Patil et al., 2018                      | IV dexamethasone      | 5/34 | 7/36 | 0.76 (0.27, 2.16)  |
| Overall ( $I^2 = \%$ , $P =$ )          |                       |      |      | 0.76 (0.27, 2.16)  |
| <b>Death</b>                            |                       |      |      |                    |
| Basu et al., 2007                       | Nebulized budesonide  | 0/32 | 2/33 | 0.21 (0.01, 4.13)  |
| Tripathi et al., 2007                   | Nebulized budesonide  | 2/17 | 3/17 | 0.67 (0.13, 3.50)  |
| Suresh et al., 2015                     | Nebulized budesonide  | 1/20 | 3/20 | 0.33 (0.04, 2.94)  |
| Garg et al., 2016                       | Nebulized budesonide  | 3/39 | 4/39 | 0.75 (0.18, 3.13)  |
| Overall ( $I^2 = 0.0\%$ , $P = 0.834$ ) |                       |      |      | 0.55 (0.22, 1.39)  |
| Basu et al., 2007                       | IV methylprednisolone | 0/34 | 2/33 | 0.19 (0.01, 3.90)  |
| Tripathi et al., 2007                   | IV methylprednisolone | 2/17 | 3/17 | 0.67 (0.13, 3.50)  |
| Overall ( $I^2 = 0.0\%$ , $P = 0.472$ ) |                       |      |      | 0.50 (0.12, 2.13)  |
| Wu et al., 1999                         | IV dexamethasone      | 2/27 | 1/23 | 1.70 (0.16, 17.60) |
| Patil et al., 2018                      | IV dexamethasone      | 0/34 | 1/36 | 0.35 (0.01, 8.36)  |
| Overall ( $I^2 = 0.0\%$ , $P = 0.431$ ) |                       |      |      | 0.98 (0.15, 6.41)  |
| Yeh et al., 1977                        | IV hydrocortisone     | 1/17 | 2/18 | 0.53 (0.05, 5.32)  |
| Overall ( $I^2 = \%$ , $P =$ )          |                       |      |      | 0.53 (0.05, 5.32)  |
| <b>Anemia</b>                           |                       |      |      |                    |
| Basu et al., 2007                       | Nebulized budesonide  | 5/32 | 3/33 | 1.72 (0.45, 6.60)  |
| Basu et al., 2007                       | IV methylprednisolone | 4/34 | 3/33 | 1.29 (0.31, 5.34)  |
| <b>Stage 2 HIE</b>                      |                       |      |      |                    |
| Garg et al., 2016                       | Nebulized budesonide  | 2/34 | 1/36 | 0.80 (0.23, 2.76)  |



|  |                       |                       |      |      |                    |
|--|-----------------------|-----------------------|------|------|--------------------|
|  | Patil et al., 2018    | IV dexamethasone      | 4/39 | 5/39 | 2.12 (0.20, 22.30) |
|  | <b>Loose motions</b>  |                       |      |      |                    |
|  | Tripathi et al., 2007 | Nebulized budesonide  | 0/17 | 2/17 | 0.20 (0.01, 3.88)  |
|  | Tripathi et al., 2007 | IV methylprednisolone | 2/17 | 2/17 | 1.00 (0.16, 6.30)  |

**Abbreviations:** CI = confidence interval; HIE = hypoxic-ischemic encephalopathy; IV = intravenous; NA = not applicable; NICU = neonatal intensive care unit; NR = not reported; PICU = pediatric intensive care unit; PS = porcine lung surfactant; SD = standard deviation

\*Converted data from median (interquartile range) to mean (SD)

Supplementary Figure S1. Results of the outcomes in the systematic review and meta-analysis

### Duration of mechanical ventilation (days)

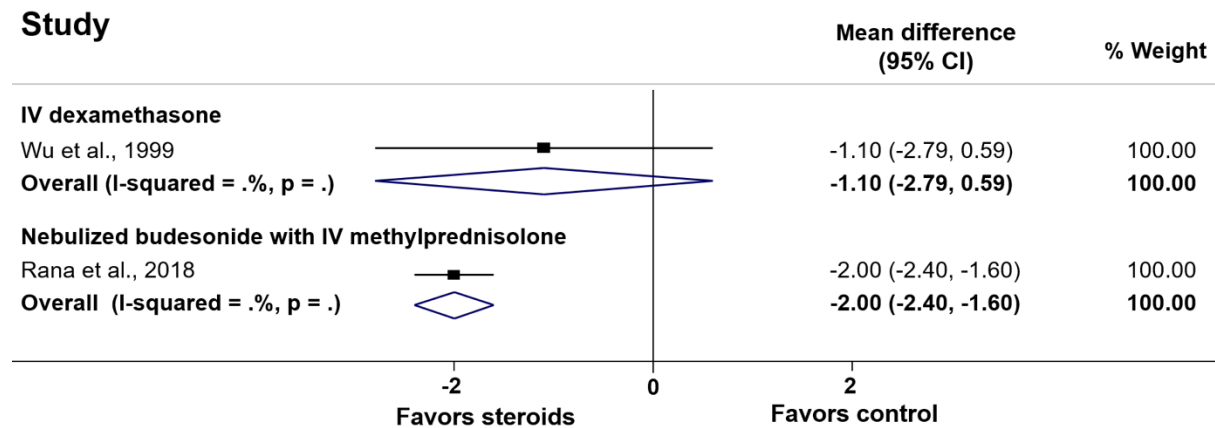

### Duration of IV fluid requirement (days)

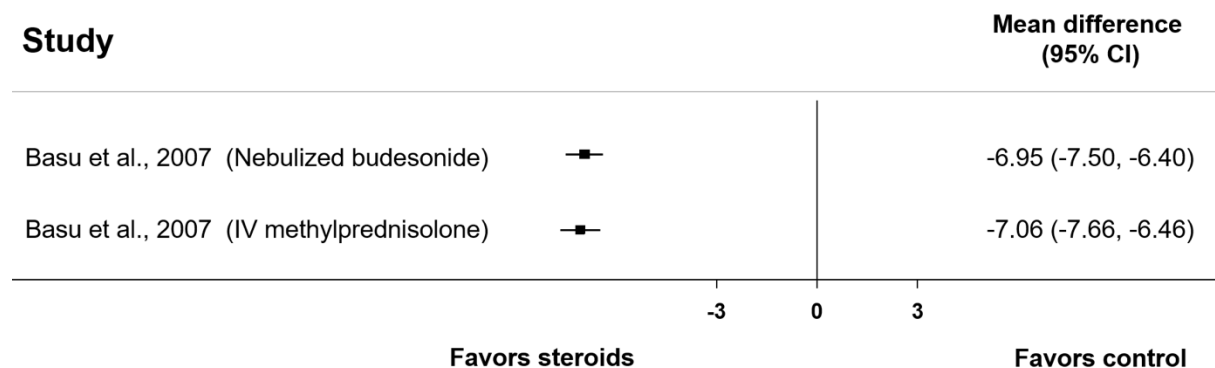

### Hypotension

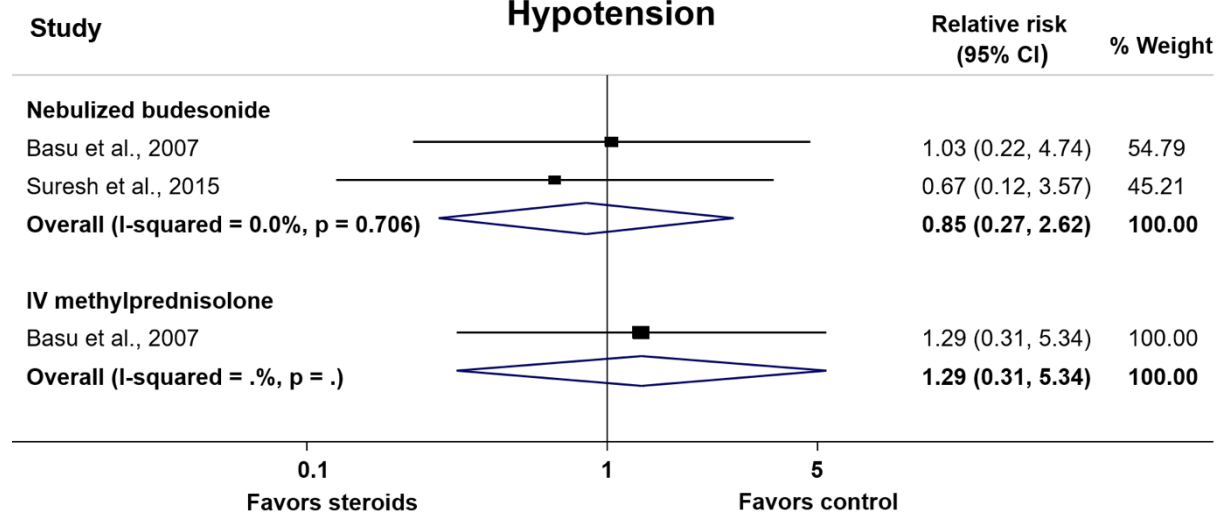

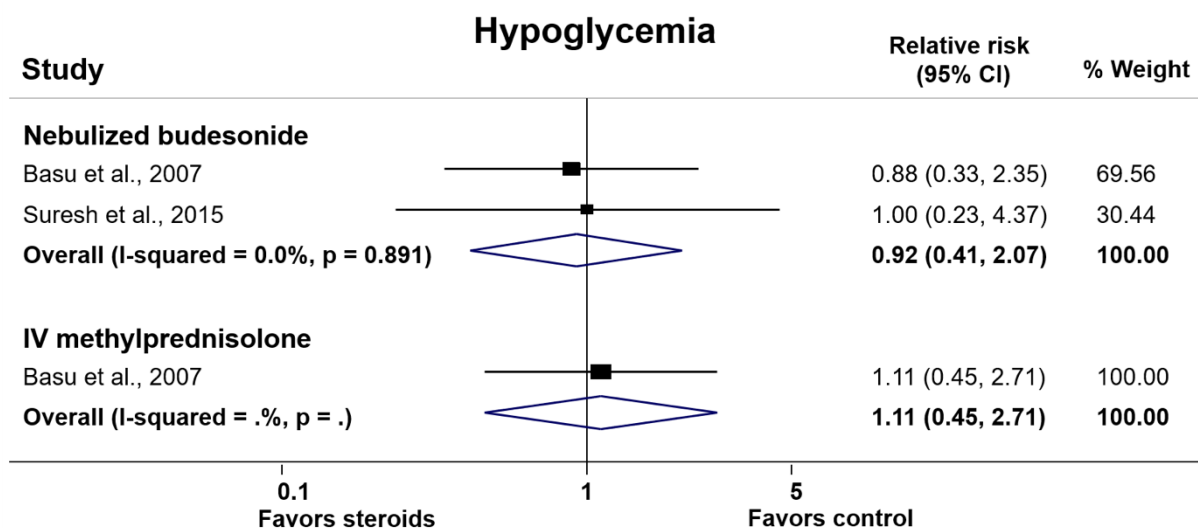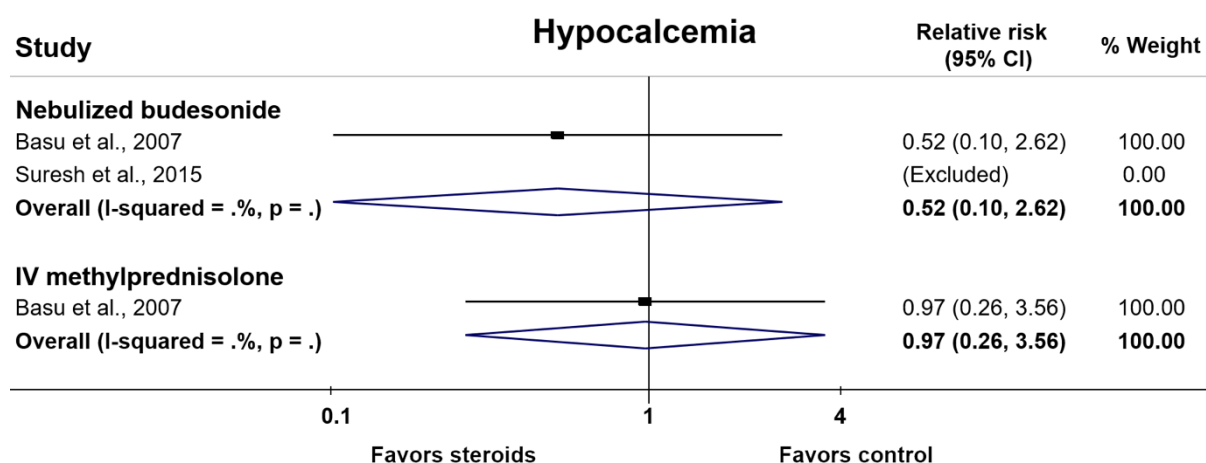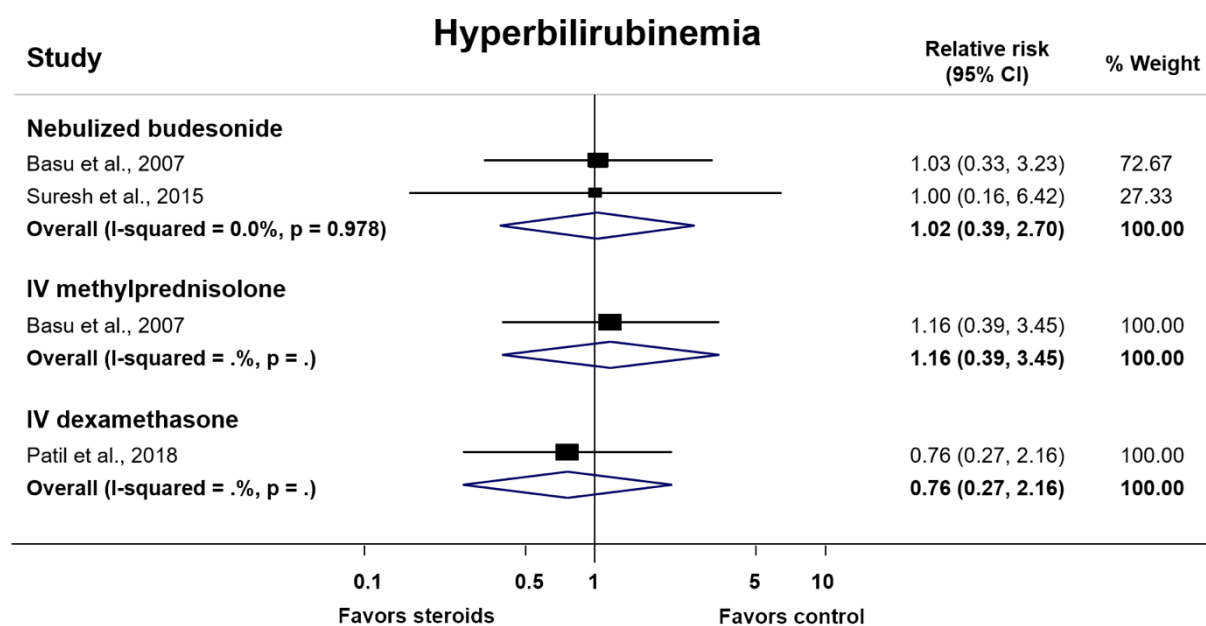

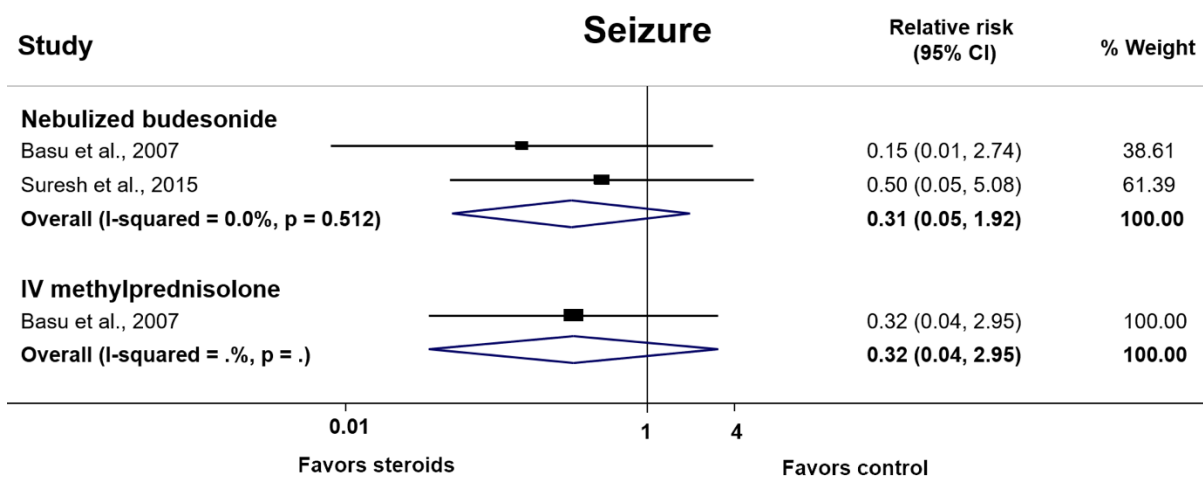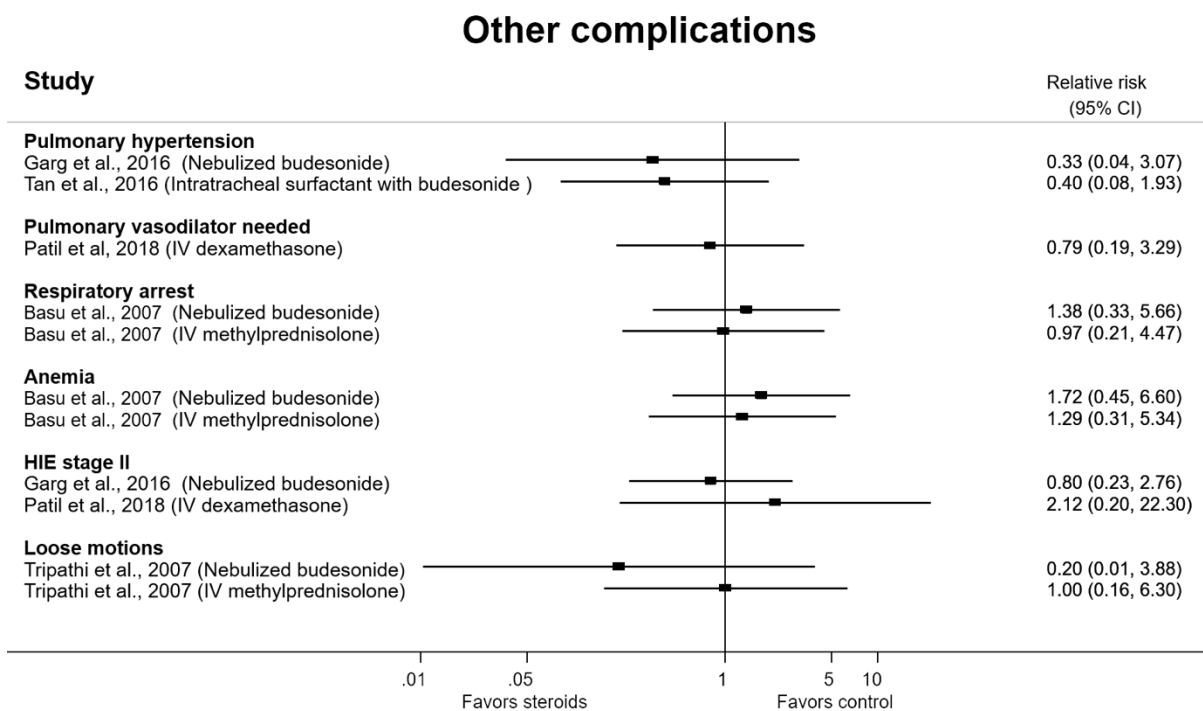

Supplement: s1 [file s1]
